# Supplementary material
Source: ML conference proceedings conference paper supplement (https://openaccess.thecvf.com/content/ACCV2020/html/Priisalu_Semantic_Synthesis_of_ACCV_2020_paper.html)
Supplement: Supplementary file 1 [file Priisalu_Semantic_Synthesis_of_ACCV_2020_supplemental.zip]

Archive with 4 entries (3 files):
- 0246-supp/
- 0246-supp/supplementary_material.pdf
- 0246-supp/pedestrian_synthesis-in-waymo.mp4
- 0246-supp/pedestrian-synthesis-in-cityscapes.mp4
